# Supplementary material
Source: publisher figshare collection journal article supplement (https://frontiersin.figshare.com/ndownloader/files/14566034)
Supplement: Supplementary file [file 14566034]

## *Supplementary Material*

# **Detection of Differentially Expressed Cleavage Site Intervals within 3' Untranslated Regions using CSI-UTR Reveals Regulated Interaction Motifs**

**Benjamin J. Harrison<sup>1,2,3</sup>, Juw Won Park<sup>3,4</sup>, Cynthia Gomes<sup>2,5</sup>, Jeffrey C. Petruska<sup>2,5,6</sup>, Matthew R. Sapio<sup>7</sup>, Michael J. Iadarola<sup>7</sup>, Julia H. Chariker<sup>2,3</sup>, and Eric C. Rouchka<sup>3,4,\*</sup>**

**\* Correspondence:**

Dr. Eric C. Rouchka

[eric.rouchka@louisville.edu](mailto:eric.rouchka@louisville.edu)

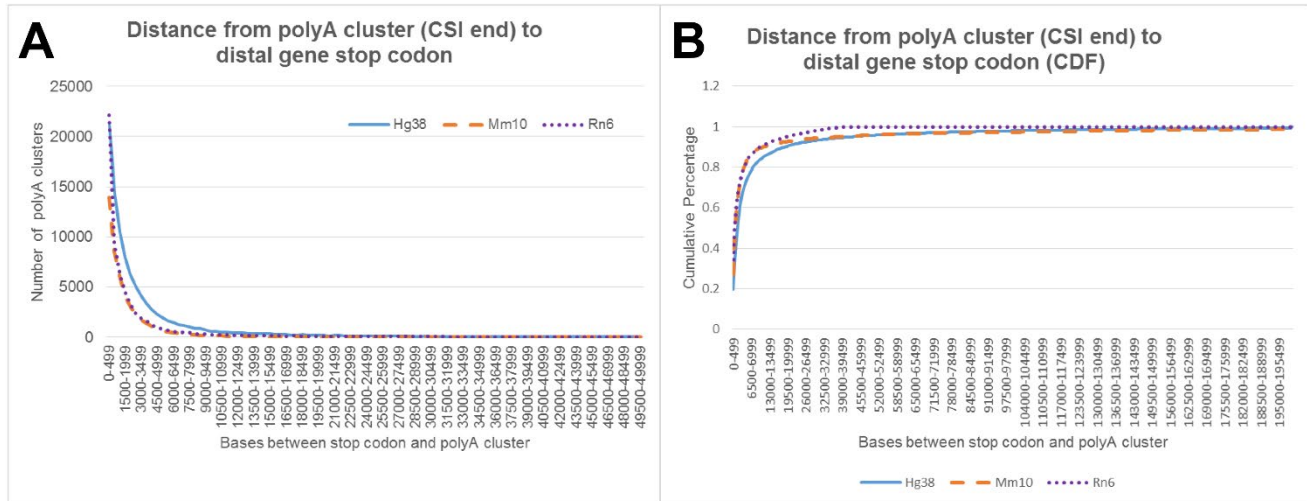

**Supplemental Figure 1: Distance from distal-most stop codon to detected polyA cluster.** (A) shows the number of polyA clusters occurring within a 500 bp bin while (B) shows the cumulative distribution. Over 90% of all identified polyA clusters are located within 20kb of the distal-most stop codon for all three species, with approximately 5% of human and mouse polyA clusters extending past 40kb.

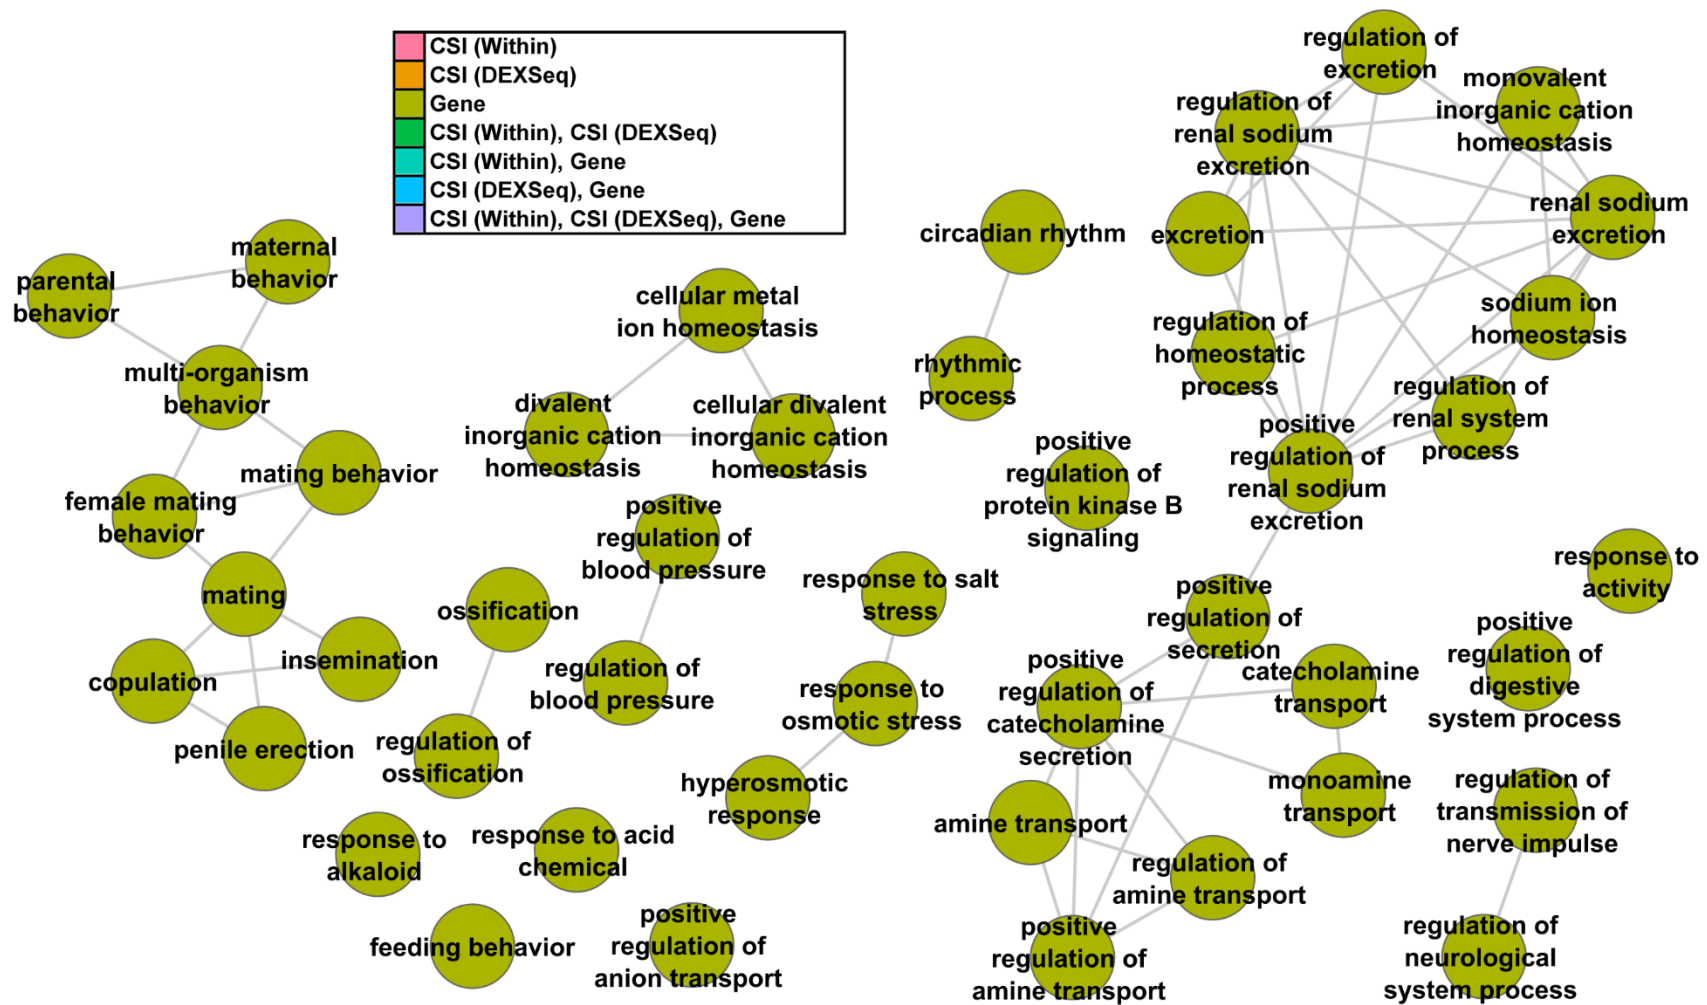

**Supplemental Figure 2: Gene Ontology Biological Process enrichment analysis using categoryCompare for human (Hs) comparison, part 1.** Categories shown pass an FDR < 0.05. Nodes represent individual GO:BP categories while edges represent connections between GO:BP categories with shared significantly differentially expressed gene lists of 90% or greater.

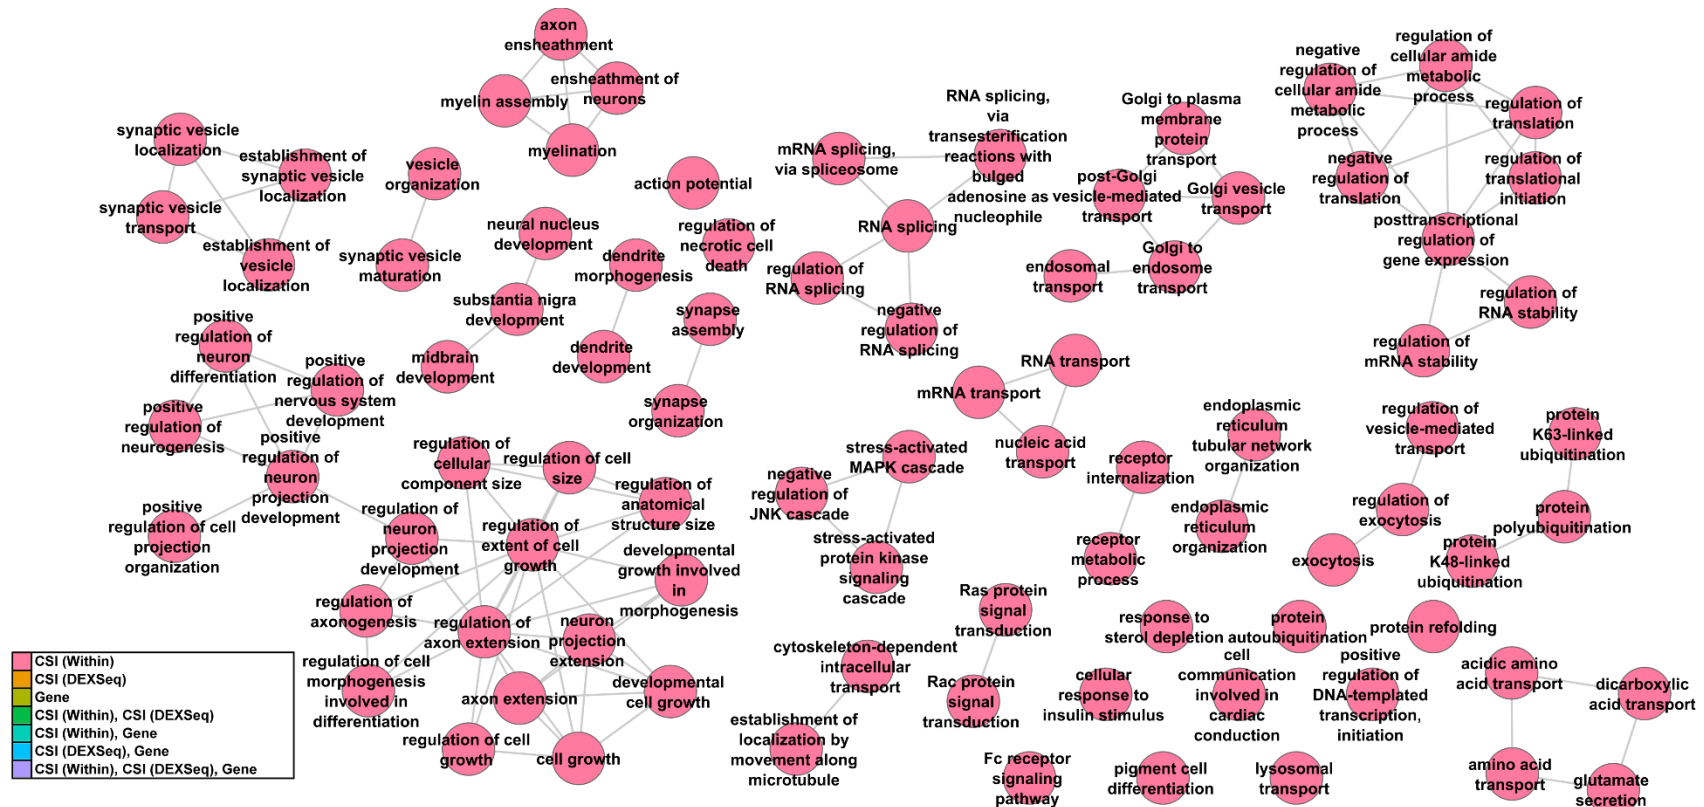

**Supplemental Figure 3: Gene Ontology Biological Process enrichment analysis using categoryCompare for human (Hs) comparison, part 2.** Categories shown pass an FDR < 0.05. Nodes represent individual GO:BP categories while edges represent connections between GO:BP categories with shared significantly differentially expressed gene lists of 90% or greater.

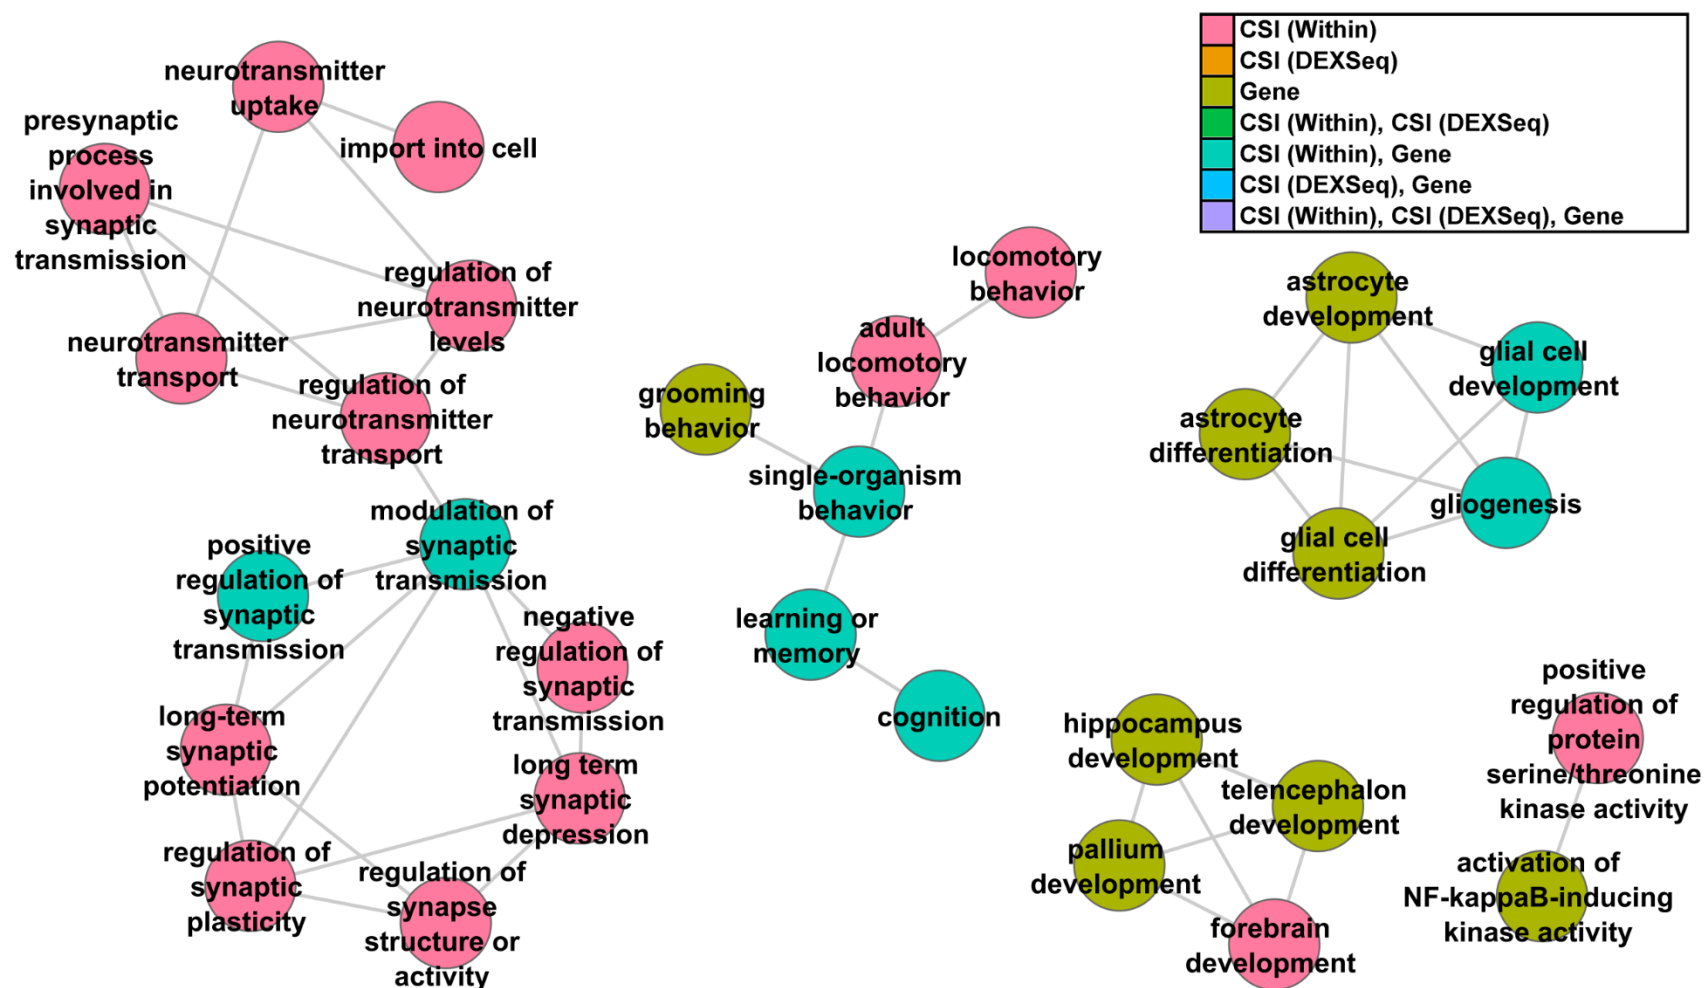

**Supplemental Figure 4: Gene Ontology Biological Process enrichment analysis using categoryCompare for human (Hs) comparison, part 3.** Categories shown pass an FDR < 0.05. Nodes represent individual GO:BP categories while edges represent connections between GO:BP categories with shared significantly differentially expressed gene lists of 90% or greater.

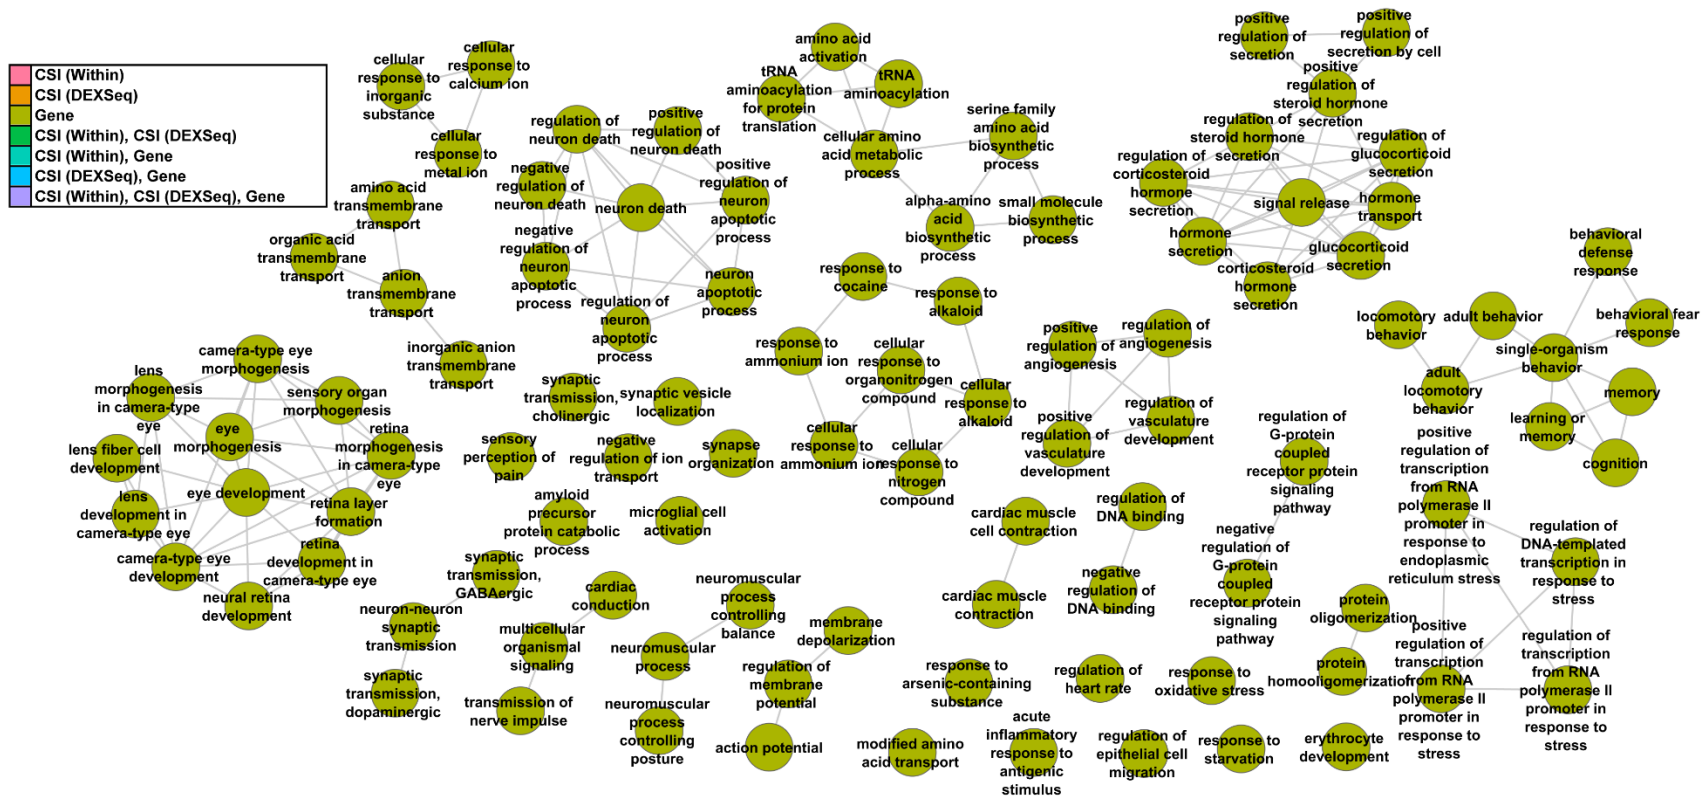





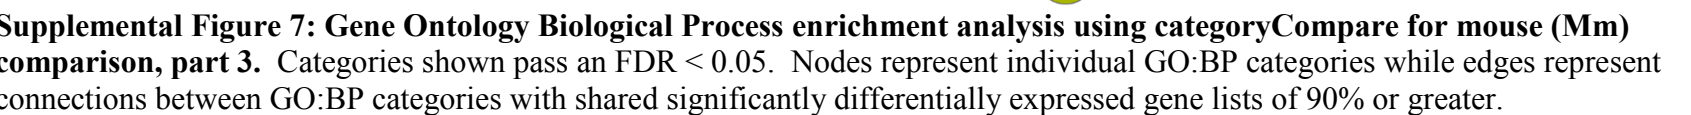



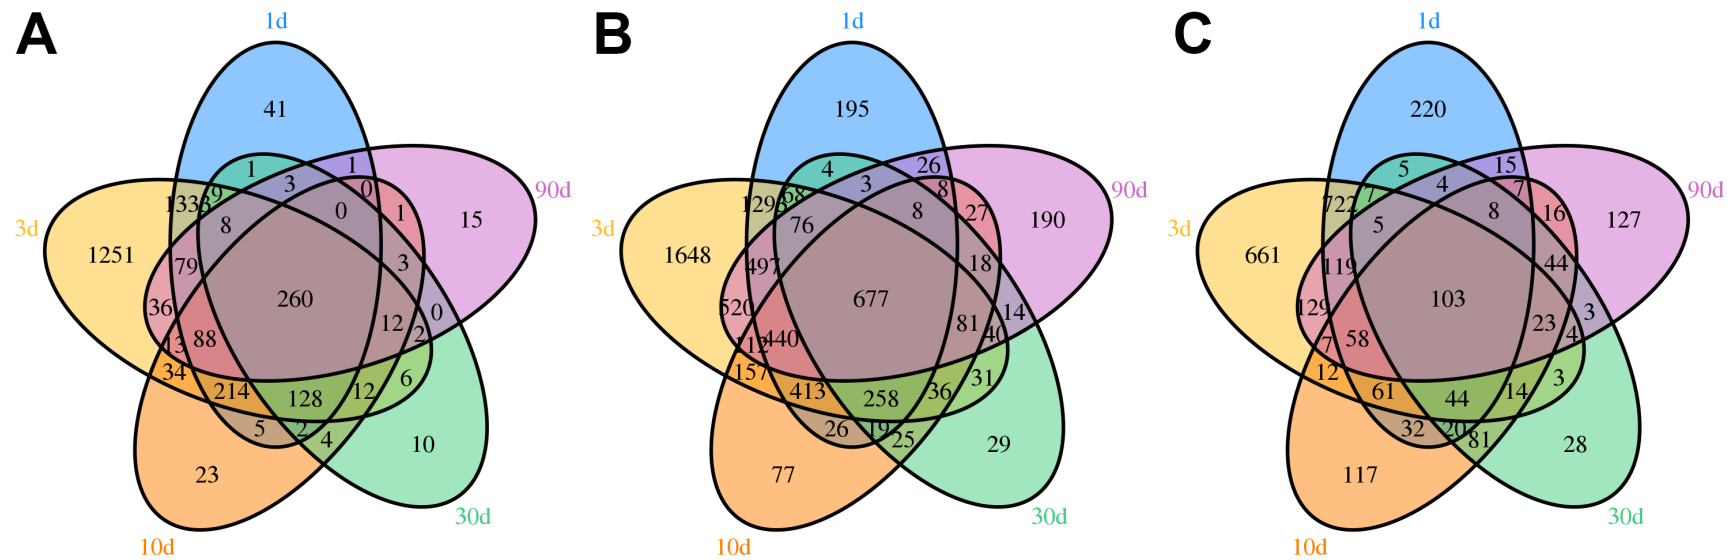

**Supplemental Figure 8: Venn diagrams for shared differentially expressed genes/genes with CSIs using (A) DE-CSIs using WITHIN; (B) DE-CSIs using DEXSeq; (C) DEGs.**

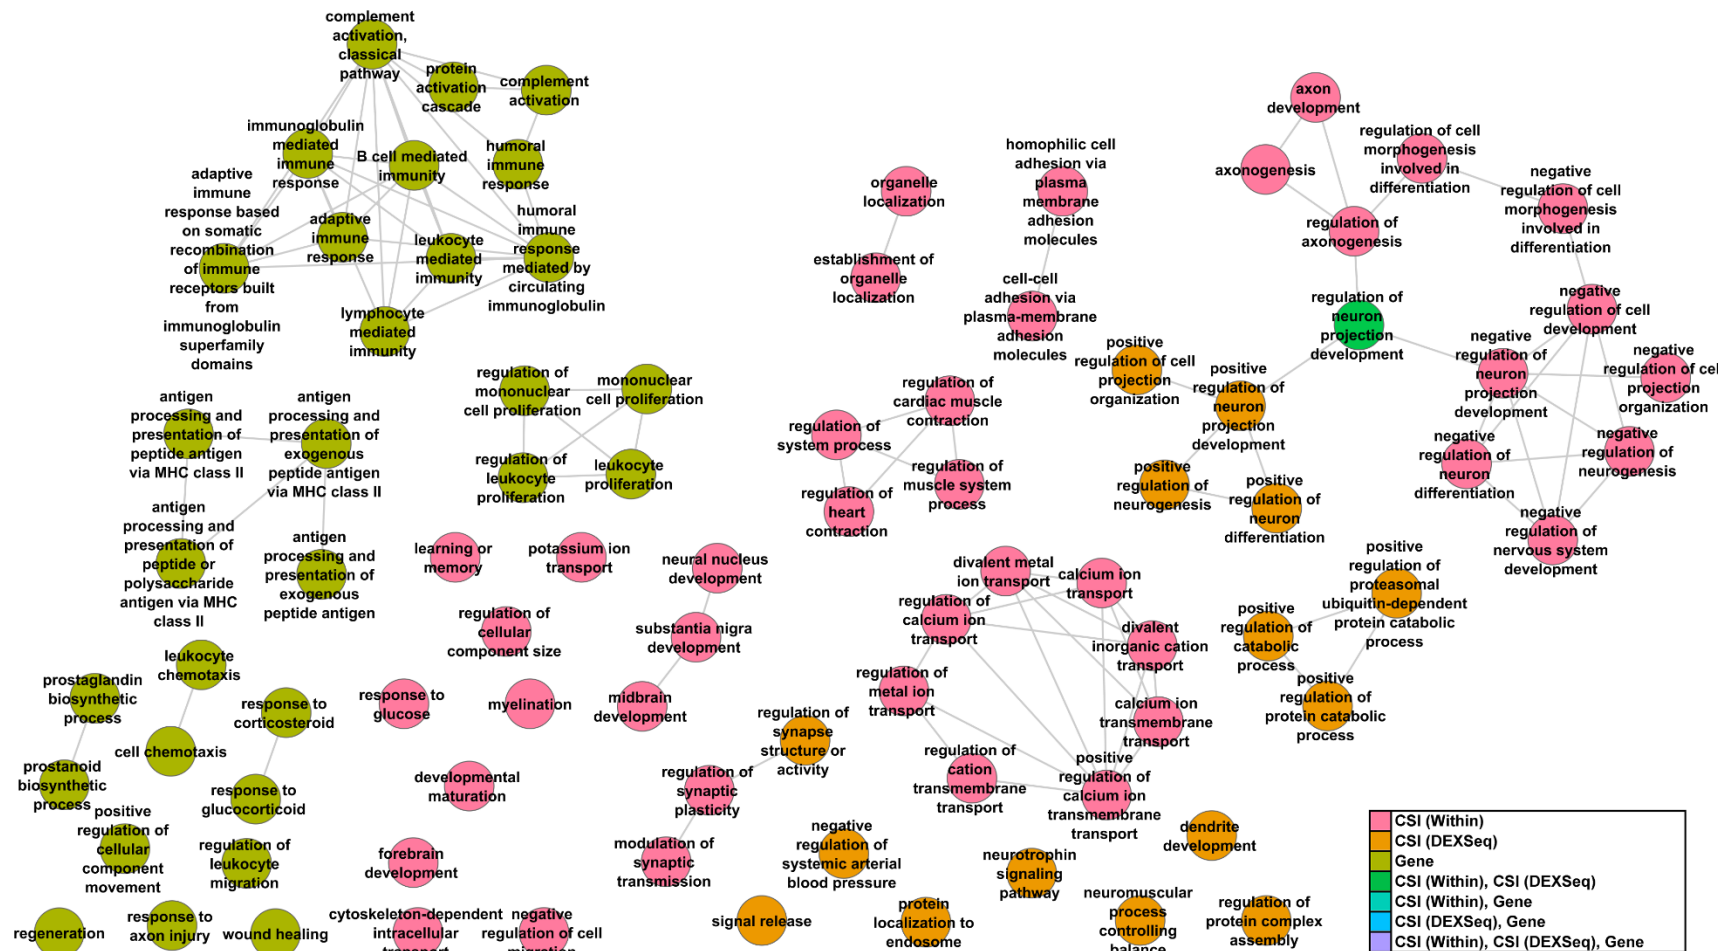

**Supplemental Figure 9: Gene Ontology Biological Process enrichment analysis using categoryCompare for common differentially expressed components for rat (Rn) comparisons.** Categories shown pass an FDR < 0.05. Nodes represent individual GO:BP categories while edges represent connections between GO:BP categories with shared significantly differentially expressed gene lists of 90% or greater.

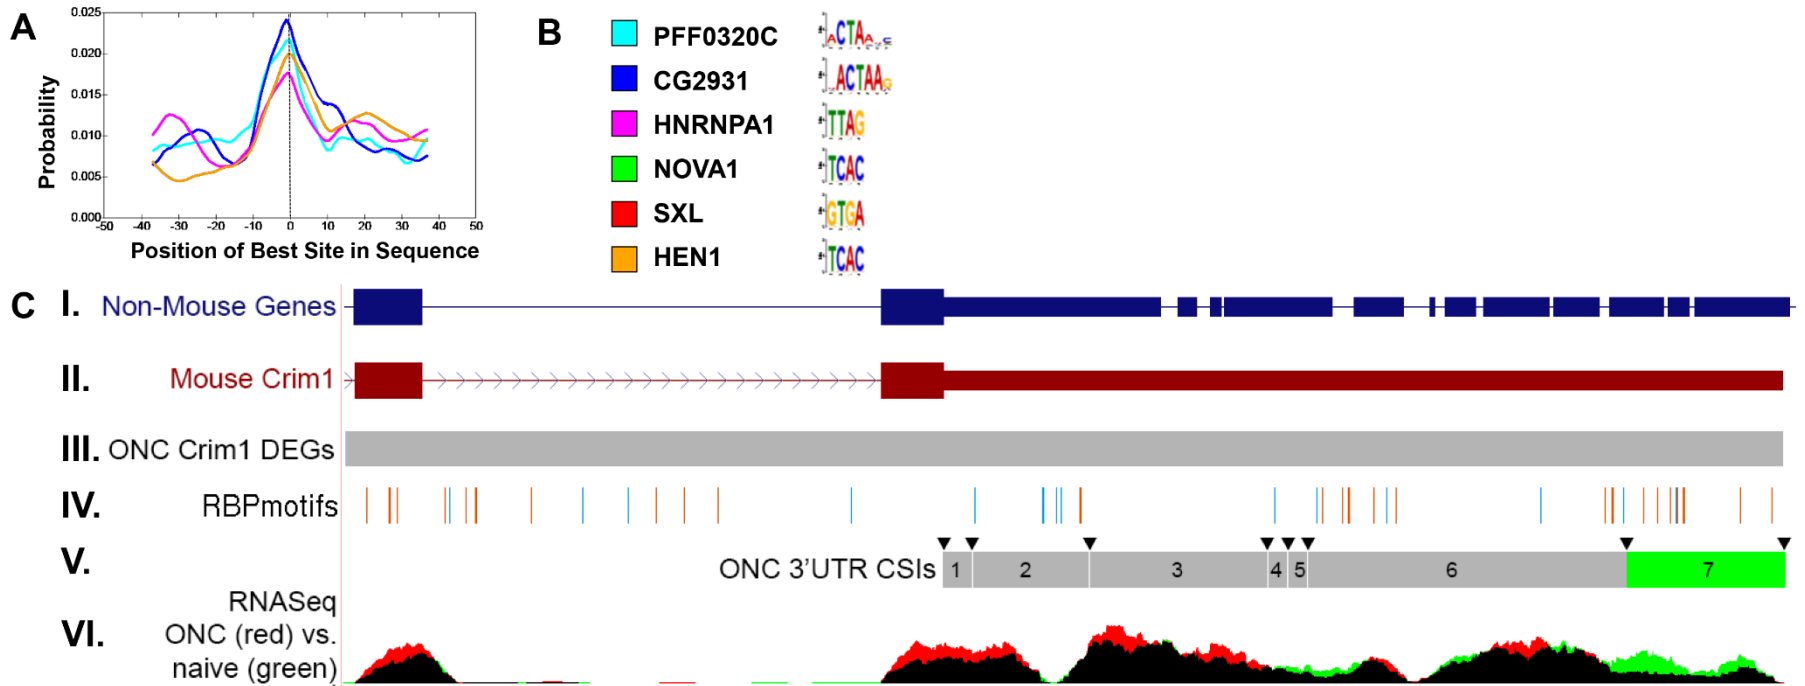

**Supplemental Figure 10: Enriched motifs for mouse optic nerve crush (ONC) differentially expressed CSIs.** Shown are enriched RNA binding protein (RBP) motifs (A) overlapping the boundaries of significantly changed CSI sites with the overlapping motifs reported in (B). Panel (C) shows an example of the CSI-UTR analysis within the mouse *Crim1* region encompassing the last two coding exons and the 3'UTR (see Figure 6 for the corresponding rat region). Subpanels I and II show that the mouse *Crim1* 3'UTR annotation extends in agreement with non-mouse *Crim1* homologs. *Crim1* is not differentially expressed at the gene level, as represented by the gray bar in subpanel III. The location of the RBP motifs from (A) and (B) are shown in subpanel IV, which are in general clustered around the CSI boundaries shown by the triangles in subpanel V. The resulting RNASeq data from the ONC model indicates a higher (but non-significant) expression in ONC (red) vs. naïve (green). However, the ONC transcripts are generally shorter, ending after CSI 6 as illustrated in subpanels V and VI. This is in contrast to the naïve transcripts that extend to the end of CSI 7 as indicated by the green portion in subpanels V and VI.

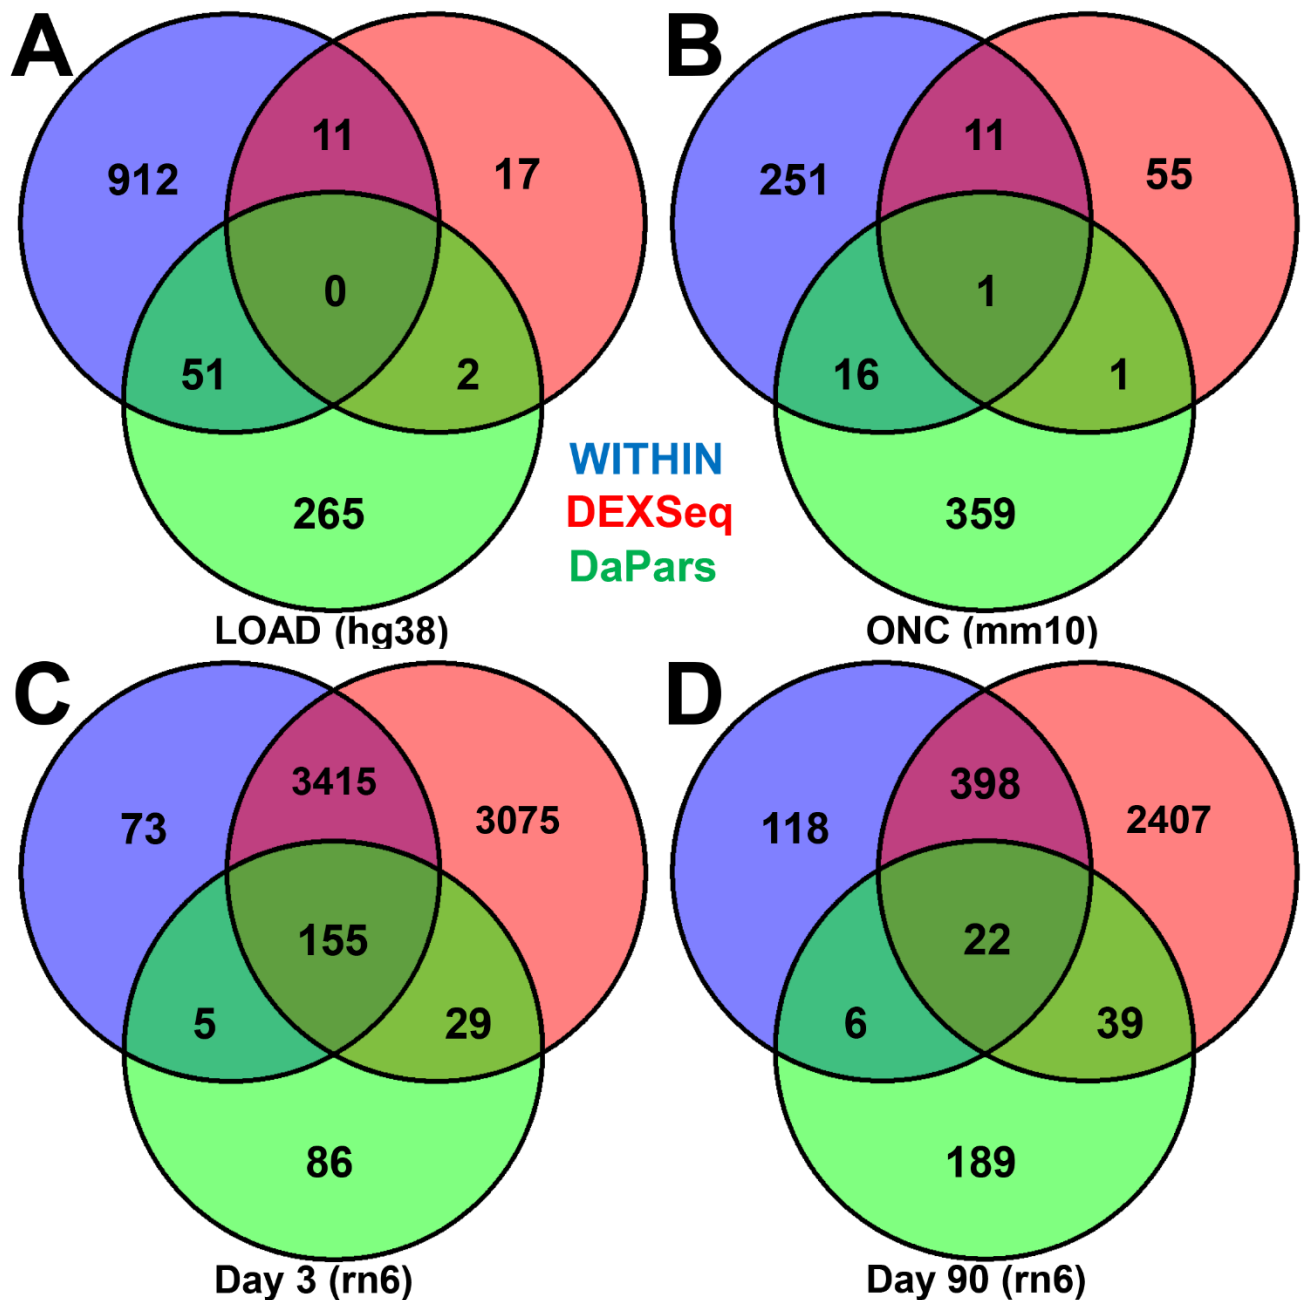

**Supplemental Figure 11: Comparison of Ensembl genes with detected CSI/APA events within the CSI-UTR WITHIN method (blue), CSI-UTR DEXSeq method (red) and DaPars (green). Shown are the results for (A) the human LOAD dataset, (B) mouse ONC dataset, (C) rat dataset at day (3) and (D) at day 90. Numbers represent the number of unique Ensembl gene identifiers found in each case. Each gene may have multiple events within them.**

**Supplemental Table 1: Top genes according to maximum number of cleavage site intervals (CSIs).**

| Gene                  | Max CSIs | Hs CSIs | Mm CSIs | Rn CSIs |
|-----------------------|----------|---------|---------|---------|
| <i>KCTD12</i>         | 77       | 77      | 11      | --      |
| <i>PTH2R</i>          | 69       | 69      | 1       | 2       |
| <i>PCDH10</i>         | 51       | 51      | 3       | 17      |
| <i>GNL3L</i>          | 50       | 50      | 2       | 5       |
| <i>MAF</i>            | 50       | 4       | 16      | 50      |
| <i>FLRT2</i>          | 49       | 49      | 11      | 6       |
| <i>Frmd8</i>          | 49       | 8       | 1       | 49      |
| <i>SLITRK1</i>        | 49       | 49      | 3       | 22      |
| <i>SPCS3</i>          | 48       | 48      | 7       | 7       |
| <i>GDAP2</i>          | 47       | 47      | 12      | 11      |
| <i>PCDH17</i>         | 47       | 21      | 19      | 47      |
| <i>ZNF514</i>         | 47       | 47      | --      | --      |
| <i>ZWINT</i>          | 47       | 47      | 7       | 16      |
| <i>MTERF1</i>         | 46       | 46      | --      | 4       |
| <i>TMEM161B</i>       | 46       | 46      | 4       | 25      |
| <i>PDZRN4</i>         | 45       | 9       | 6       | 45      |
| <i>SMAD2</i>          | 44       | 44      | 13      | 13      |
| <i>UBE2V2</i>         | 43       | 43      | 10      | 13      |
| <i>ZMAT3</i>          | 43       | 43      | 7       | 9       |
| <i>DR1</i>            | 42       | 42      | 5       | --      |
| <i>AABR07050561.1</i> | 41       | --      | --      | 41      |
| <i>ARL5A</i>          | 41       | 41      | 12      | 10      |
| <i>CRIP1</i>          | 40       | 40      | 6       | 12      |
| <i>PCDH9</i>          | 40       | 11      | 6       | 40      |
| <i>RAB18</i>          | 40       | 40      | 14      | 11      |
| <i>QKI</i>            | 39       | 39      | 18      | 26      |
| <i>G6PC</i>           | 38       | 38      | 3       | 1       |
| <i>ACTR3C</i>         | 37       | 37      | --      | --      |
| <i>FAM46A</i>         | 37       | 37      | 3       | 9       |
| <i>NCAM2</i>          | 37       | 11      | 12      | 37      |
| <i>PPP1R3A</i>        | 37       | 37      | 13      | 2       |
| <i>SNX18</i>          | 37       | 37      | 10      | 8       |
| <i>SOD2</i>           | 37       | 37      | 8       | 17      |



**Supplemental Table 2: Enriched GO:BP categories for DEGs from human (Hs) comparison (FDR  $\leq$  0.001).**

| <b>GO ID</b> | <b>Description</b>       | <b>Count</b> | <b>P-value</b> | <b>FDR</b> |
|--------------|--------------------------|--------------|----------------|------------|
| GO:0044708   | single-organism behavior | 11           | 7.61E-08       | 0          |

**Supplemental Table 3: Enriched GO:BP categories for DE-CSIs using the WITHIN pipeline for the human (Hs) comparison (FDR ≤ 0.001).**

| GO ID      | Description                                           | Count | P-value  | FDR      |
|------------|-------------------------------------------------------|-------|----------|----------|
| GO:0021762 | substantia nigra development                          | 12    | 1.53E-06 | 0.001    |
| GO:0048667 | cell morphogenesis involved in neuron differentiation | 53    | 1.58E-06 | 0.000952 |

**Supplemental Table 4: Enriched GO:BP categories for DEGs for the mouse (Mm) comparison (FDR  $\leq$  0.001).**

| GO ID      | Description                                                                       | Count | P-value  | FDR      |
|------------|-----------------------------------------------------------------------------------|-------|----------|----------|
| GO:0034765 | regulation of ion transmembrane transport                                         | 28    | 1.74E-12 | 0        |
| GO:0034762 | regulation of transmembrane transport                                             | 28    | 4.30E-12 | 0        |
| GO:0098655 | cation transmembrane transport                                                    | 30    | 8.79E-11 | 0        |
| GO:0098662 | inorganic cation transmembrane transport                                          | 28    | 5.44E-10 | 0        |
| GO:0015672 | monovalent inorganic cation transport                                             | 25    | 4.61E-09 | 0        |
| GO:0044708 | single-organism behavior                                                          | 25    | 2.49E-08 | 0        |
| GO:1904062 | regulation of cation transmembrane transport                                      | 17    | 3.10E-08 | 0        |
| GO:0032409 | regulation of transporter activity                                                | 16    | 4.47E-08 | 0        |
| GO:0010959 | regulation of metal ion transport                                                 | 21    | 5.01E-08 | 0        |
| GO:0032412 | regulation of ion transmembrane transporter activity                              | 15    | 7.24E-08 | 0        |
| GO:0050804 | modulation of synaptic transmission                                               | 20    | 7.47E-08 | 0        |
| GO:0022898 | regulation of transmembrane transporter activity                                  | 15    | 1.12E-07 | 0        |
| GO:0035637 | multicellular organismal signaling                                                | 12    | 2.07E-07 | 0        |
| GO:0015844 | monoamine transport                                                               | 10    | 3.52E-07 | 0        |
| GO:0001508 | action potential                                                                  | 12    | 3.90E-07 | 0        |
| GO:0007270 | neuron-neuron synaptic transmission                                               | 13    | 5.28E-07 | 0        |
| GO:0043010 | camera-type eye development                                                       | 18    | 7.09E-07 | 0        |
| GO:0042391 | regulation of membrane potential                                                  | 20    | 7.38E-07 | 0        |
| GO:0001654 | eye development                                                                   | 19    | 1.37E-06 | 0        |
| GO:0050905 | neuromuscular process                                                             | 11    | 1.74E-06 | 0        |
| GO:0043618 | regulation of transcription from RNA polymerase II promoter in response to stress | 7     | 2.26E-06 | 0        |
| GO:0043620 | regulation of DNA-templated transcription in response to stress                   | 7     | 4.33E-06 | 0        |
| GO:0035725 | sodium ion transmembrane transport                                                | 9     | 7.36E-06 | 0        |
| GO:0050806 | positive regulation of synaptic transmission                                      | 11    | 8.49E-06 | 0        |
| GO:0006837 | serotonin transport                                                               | 5     | 9.30E-06 | 0.000328 |
| GO:0006813 | potassium ion transport                                                           | 13    | 1.16E-05 | 0.000645 |
| GO:0048593 | camera-type eye morphogenesis                                                     | 10    | 1.30E-05 | 0.000635 |
| GO:0071805 | potassium ion transmembrane transport                                             | 11    | 1.53E-05 | 0.000909 |
| GO:0071804 | cellular potassium ion transport                                                  | 11    | 1.63E-05 | 0.000896 |
| GO:0015872 | dopamine transport                                                                | 6     | 1.67E-05 | 0.00087  |

**Supplemental Table 5: Enriched GO:BP categories for DE-CSIs using the WITHIN pipeline for the mouse (Mm) comparison ( $p \leq 0.05$ ).**

| <b>GO ID</b> | <b>Description</b>                             | <b>Count</b> | <b>P-value</b> | <b>FDR</b> |
|--------------|------------------------------------------------|--------------|----------------|------------|
| GO:0034248   | regulation of cellular amide metabolic process | 15           | 6.11E-06       | 0          |
| GO:0006417   | regulation of translation                      | 14           | 9.82E-06       | 0.000417   |
| GO:0050804   | modulation of synaptic transmission            | 10           | 0.005317       | 0.062026   |

**Supplemental Table 6: Enriched GO:BP categories for DE-CSIs using the DEXSeq pipeline for the mouse (Mm) comparison ( $p \leq 0.05$ ).**

| <b>GO ID</b> | <b>Description</b>                        | <b>Count</b> | <b>P-value</b> | <b>FDR</b> |
|--------------|-------------------------------------------|--------------|----------------|------------|
| GO:0050905   | neuromuscular process                     | 4            | 0.000624       | 0.187273   |
| GO:0098662   | inorganic cation transmembrane transport  | 7            | 0.000833       | 0.21       |
| GO:0098655   | cation transmembrane transport            | 7            | 0.001141       | 0.211111   |
| GO:0071805   | potassium ion transmembrane transport     | 4            | 0.001441       | 0.22381    |
| GO:0071804   | cellular potassium ion transport          | 4            | 0.001477       | 0.204348   |
| GO:0007270   | neuron-neuron synaptic transmission       | 4            | 0.001589       | 0.2096     |
| GO:0006837   | serotonin transport                       | 2            | 0.001927       | 0.189697   |
| GO:0006813   | potassium ion transport                   | 4            | 0.004326       | 0.302319   |
| GO:0015872   | dopamine transport                        | 2            | 0.006517       | 0.284719   |
| GO:0042391   | regulation of membrane potential          | 5            | 0.006979       | 0.338505   |
| GO:0015672   | monovalent inorganic cation transport     | 5            | 0.011826       | 0.346667   |
| GO:0050804   | modulation of synaptic transmission       | 4            | 0.0203         | 0.39747    |
| GO:0015844   | monoamine transport                       | 2            | 0.028922       | 0.41854    |
| GO:0034765   | regulation of ion transmembrane transport | 4            | 0.032102       | 0.431361   |
| GO:0034762   | regulation of transmembrane transport     | 4            | 0.036082       | 0.440574   |
